# Supplementary material for: Thermal Degradation Kinetics Analysis of Ethylene-Propylene Copolymer and EP-1-Hexene Terpolymer
Source: MDPI journal article supplement (doi:10.3390/polym14030634), 2022-02-07
Supplement: s1 [file s1]

Supporting Information

# Thermal Degradation Kinetics Analysis of Ethylene-Propylene Copolymer and EP-1-Hexene Terpolymer

Hassam Mazhar <sup>1</sup>, Farrukh Shehzad <sup>1</sup>, Sung-Gil Hong <sup>2</sup> and Mamdouh A. Al-Harhi <sup>1,3,\*</sup>

<sup>1</sup> Department of Chemical Engineering, King Fahd University of Petroleum & Minerals, Dhahran 31261, Saudi Arabia; hassam.mazharulhaque@kfupm.edu.sa (H.M.); farrukh@kfupm.edu.sa (F.S.)

<sup>2</sup> TS&D Center, S-OIL Corporation, Seoul 07793, Korea; sghong0927soil@gmail.com

<sup>3</sup> Center for Refining and Advance Chemicals, The Research Institute, King Fahd University of Petroleum & Minerals, Dhahran 31261, Saudi Arabia

\* Correspondence: mamdouh@kfupm.edu.sa

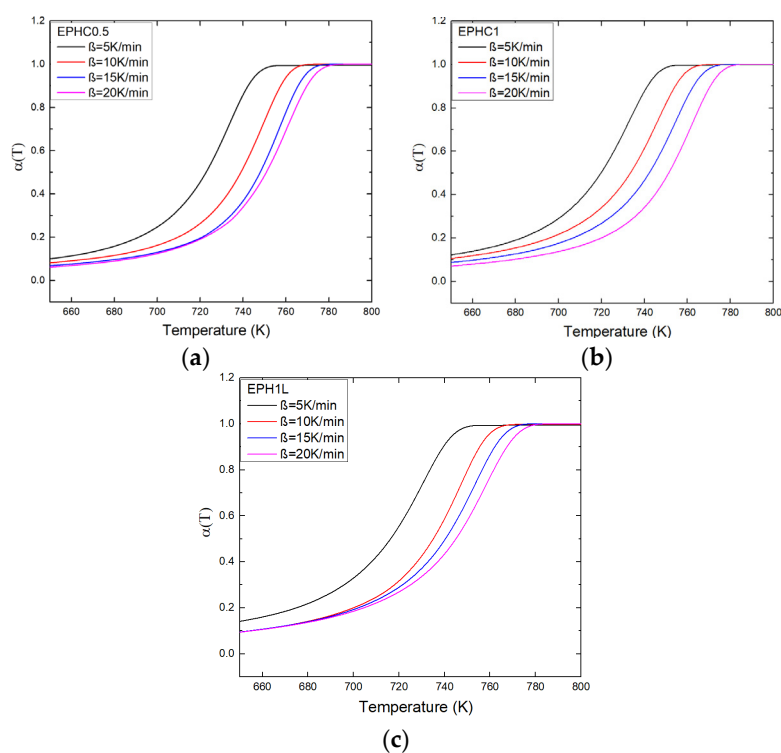

**Figure S1.** Fractional conversion ( $\alpha$ ) with respect to temperature is plotted for (a) EPH0.5 (b) EPH1 (c) EPH1L

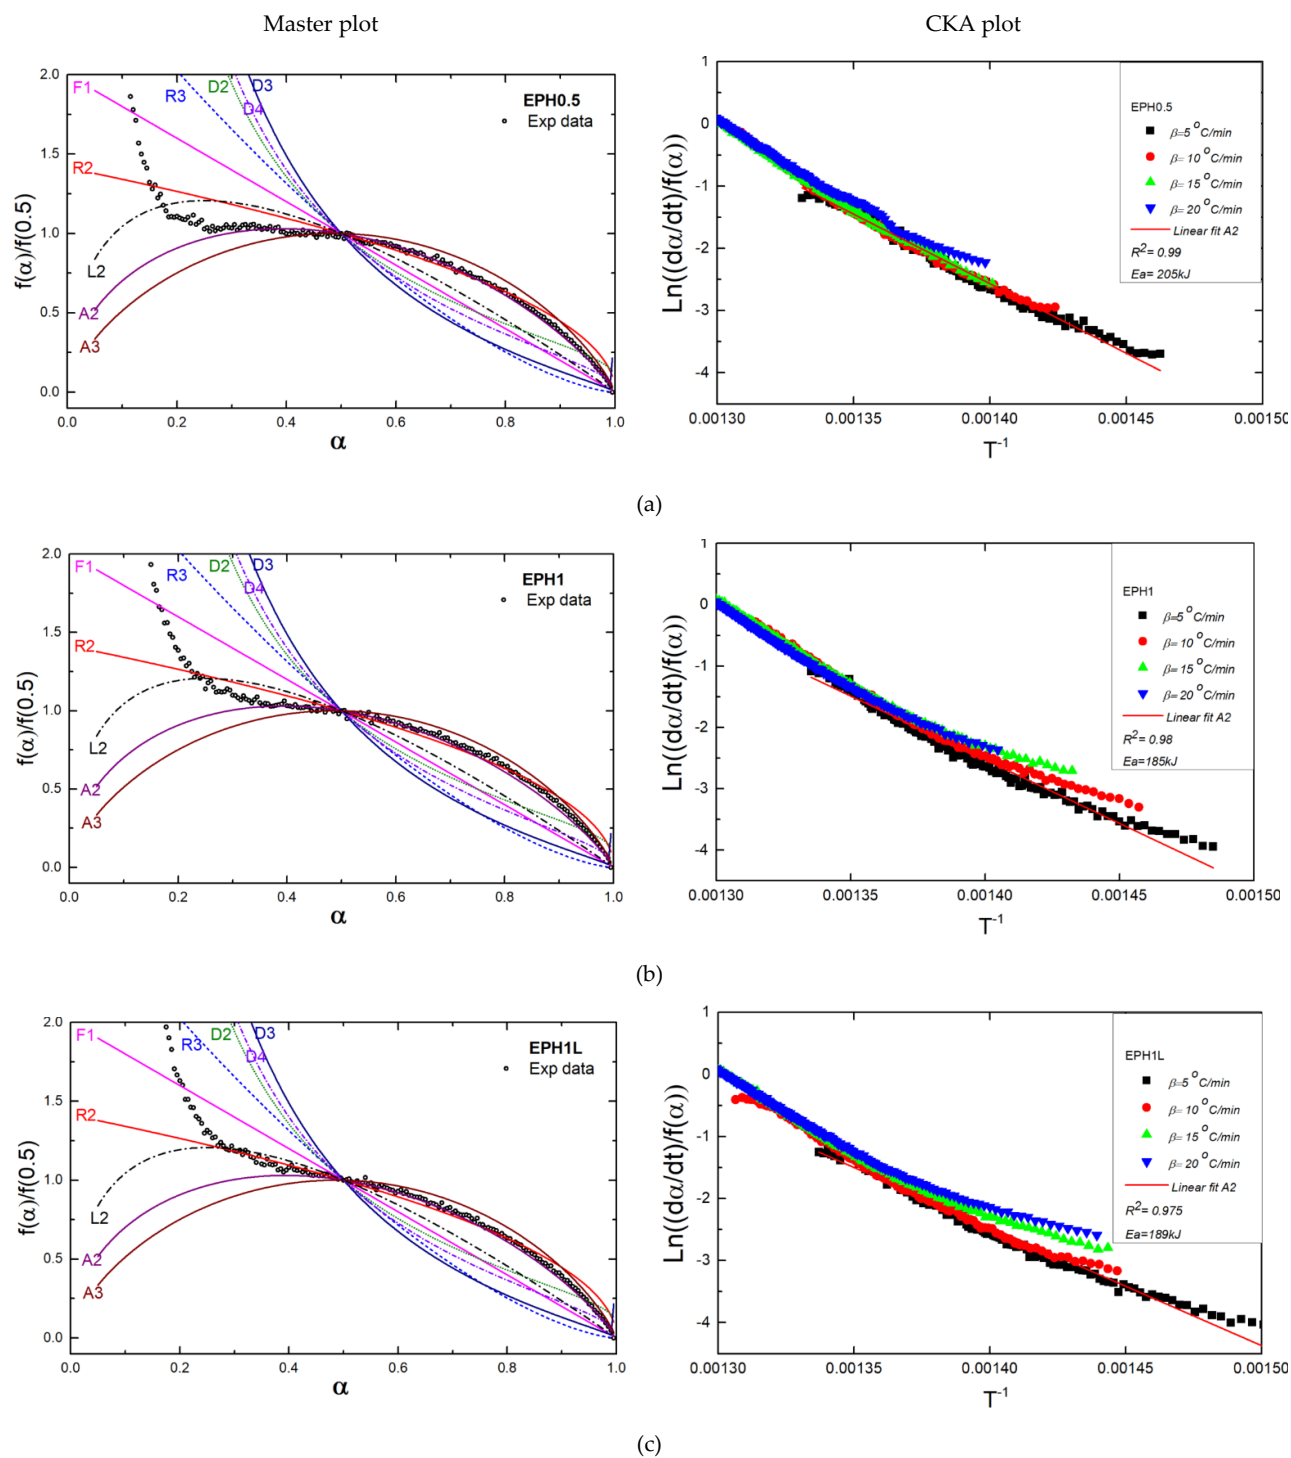

Figure S2. : Shows the Generalized master plot and Combined kinetic (CKA) plot (a) EPH0.5 (b) EPH1 (c) EPH1L.
